# Supplementary material
Source: PubMed Central journal article supplement (PMC2375559)
Supplement: tjp0586-0131-SD2.pdf [file tjp0586-0131-SD2.pdf]

## Supplementary material

*Details on the general methodology*

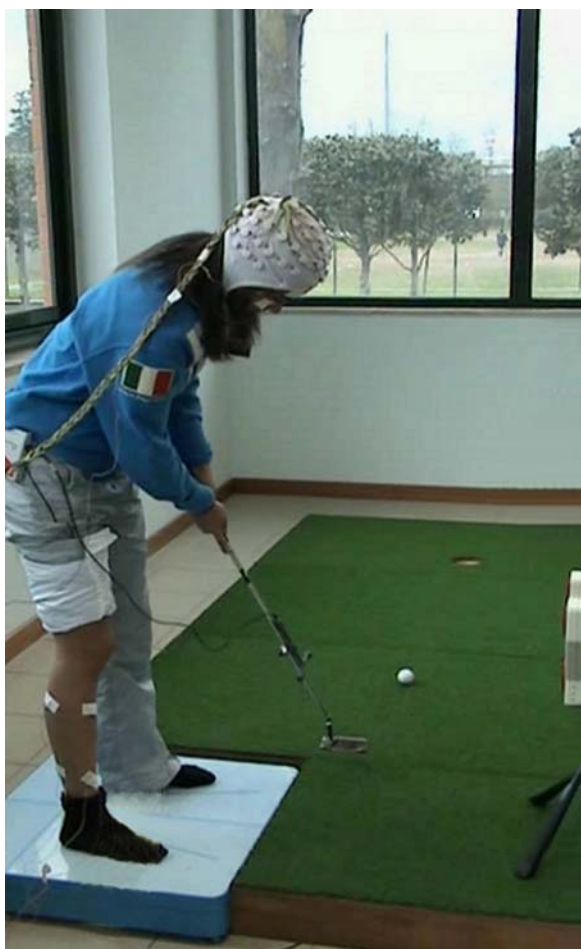

**Fig. I.** The golf green simulator used for the present study.

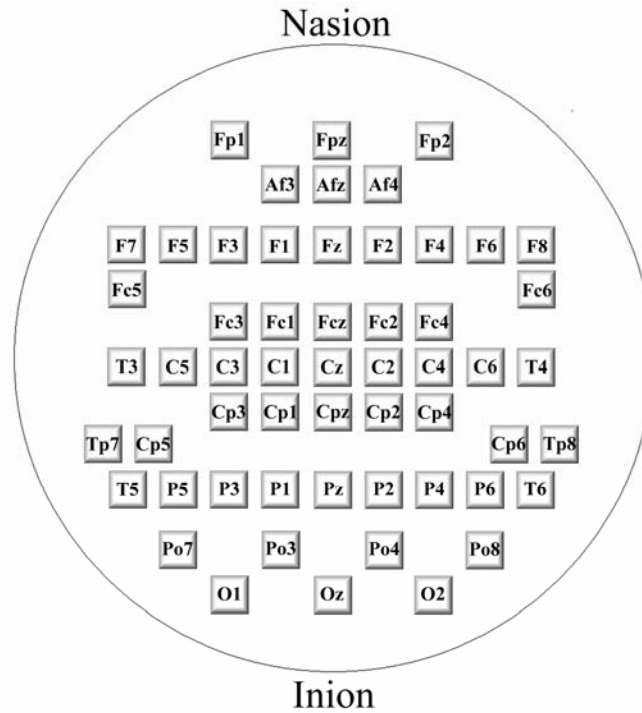

**Fig. II.** Electroencephalographic (EEG) electrode montage.

Surface Laplacian estimation (regularized 3-D spline function; Babiloni et al. 1996, 1998) acts as a spatial filter of the EEG potential distribution that reduces the effects of head volume conductor and annuls the influence of electrode reference (Nunez 1995; Babiloni et al. 1996).

## References

Babiloni F, Babiloni C, Carducci F, Fattorini L, Onorati P, Urbano A. Spline Laplacian estimate of EEG potentials over a realistic magnetic resonance-constructed scalp surface model. *Electroencephalogr Clin Neurophysiol.* 1996 Apr;98(4):363-73.

Babiloni F, Carducci F, Babiloni C, Urbano A. Improved realistic Laplacian estimate of highly-sampled EEG potentials by regularization techniques. *Electroencephalogr Clin Neurophysiol.* 1998 Apr;106(4):336-43.

Nunez PL. *Neocortical dynamic and human EEG rhythms.* Oxford University Press New York. 1995
